# Supplementary material for: Cost-effective preparation of cobalt oxide/nickel oxide composite for the efficient non-enzymatic electrochemical detection of uric acid
Source: Royal Society of Chemistry journal article supplement (doi:10.1039/d6ra01598k), 2026-05-15
Supplement: d6ra01598k1.pdf [file d6ra01598k1.pdf]

## Supplementary information

### Cost-effective preparation of cobalt oxide/nickel oxide composite for the efficient non-enzymatic electrochemical detection of uric acid

Arslan Uddin Qureshi<sup>a</sup>, Humaira Khan<sup>a</sup>, Aneela Tahira<sup>b</sup>, Shaista Bano Memon<sup>i</sup>, Asma Hayat<sup>a,j</sup>, Saba Naz<sup>a</sup>, Muhammad Ali Bhatti<sup>d</sup>, Aftab Ahmed Khand<sup>e</sup>, Matteo Tonezzer<sup>e</sup>, Brigitte Vigolo<sup>f</sup>, Elmuez Dawi<sup>g</sup>, Rafat M. Ibrahim<sup>h</sup>, Zafar Hussain Ibupoto<sup>a\*</sup>

<sup>a</sup>*Institute of Chemistry, University of Sindh, Jamshoro 76080, Pakistan.*

<sup>b</sup>*Institute of Chemistry, Shah Abdul Latif University Khairpur Mirs, Sindh, Pakistan.*

<sup>c</sup>*Department of Physiology and MLT, University of Sindh, Jamshoro, Pakistan*

<sup>d</sup>*Centre for Environmental Sciences, University of Sindh Jamshoro, 76080, Sindh, Pakistan.*

<sup>e</sup>*Department of Chemical and Geological Sciences, University of Cagliari, Monserrato, Italy.*

<sup>f</sup>*Université de Lorraine, CNRS, Institut Jean Lamour-IJL, F-54000 Nancy, France.*

<sup>g</sup>*College of Humanities and Sciences, Department of Mathematics and Sciences, Ajman University, P.O. Box 346, Ajman, UAE.*

<sup>h</sup>*Physics*

*Department, College of Science, Taibah University, Madainah, Saudi Arabia.*

<sup>i</sup>*Institute of*

*Microbiology, University of Sindh, Jamshoro (76080), Pakistan*

<sup>j</sup>*Department of Chemistry, Turbat University, Turbat Balchistant, Pakistan*

\*Corresponding author(s): Zafar Hussain Ibupoto, PhD, Email: [zaffar.ibhupoto@usindh.edu.pk](mailto:zaffar.ibhupoto@usindh.edu.pk)

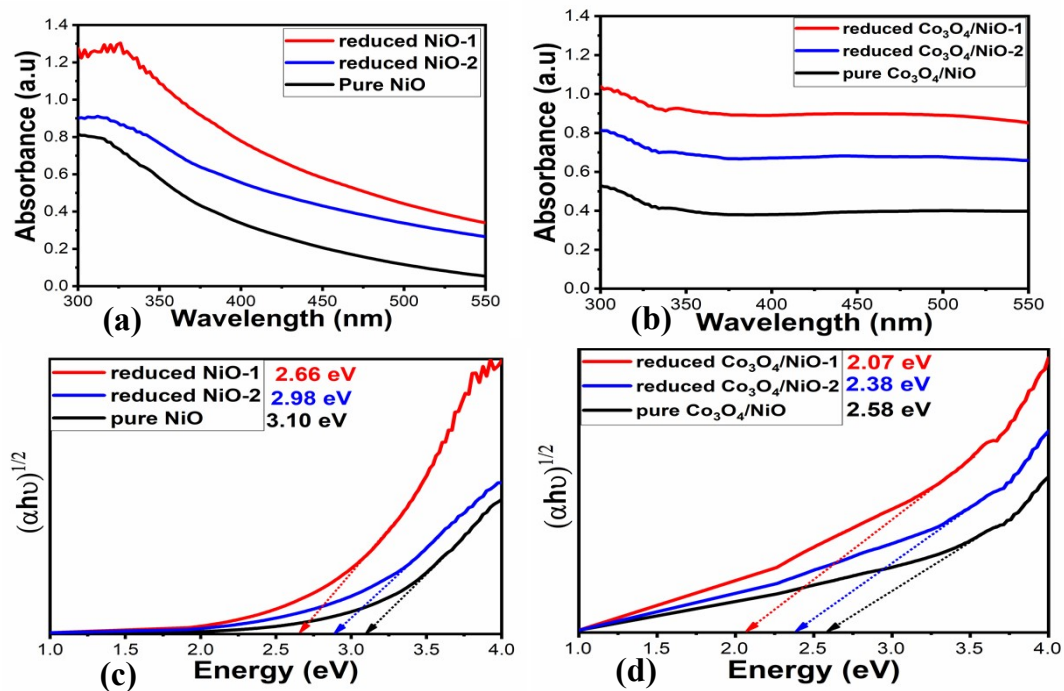

**Figure (S1):** (a) UV–visible spectra of pure NiO and reduced NiO nanostructures, (b) UV–visible spectra of pure Co<sub>3</sub>O<sub>4</sub>/NiO and reduced Co<sub>3</sub>O<sub>4</sub>/NiO composite, (c-d) their corresponding Tauc's plots for the calculation of optical band gap.

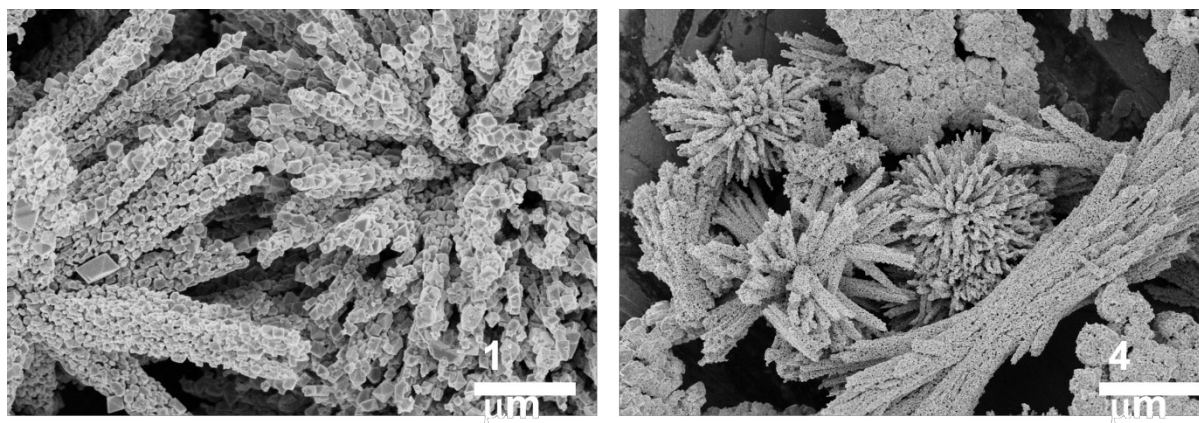

**Figure (S2):** (a-b) SEM images of bare Co<sub>3</sub>O<sub>4</sub> at different magnifications

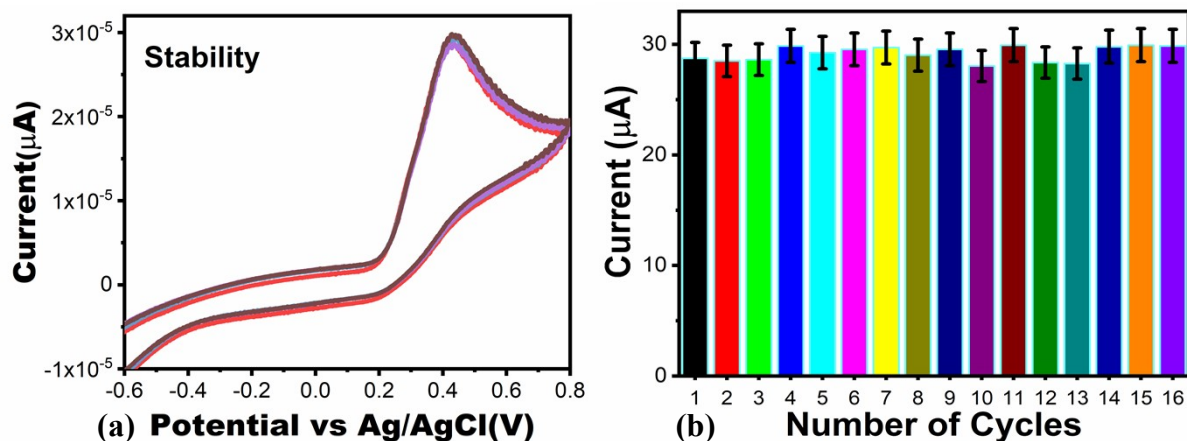

Figure (S3): (a) Repeatable 16 CV curves at scan rate of 50 mV/s of  $\text{Co}_3\text{O}_4/\text{NiO}$  composite in 0.1 mM UA prepared in 0.1 M PBS of pH 7.3, (b) Bar graph illustrating the reproducibility of 16 independent modified electrodes.

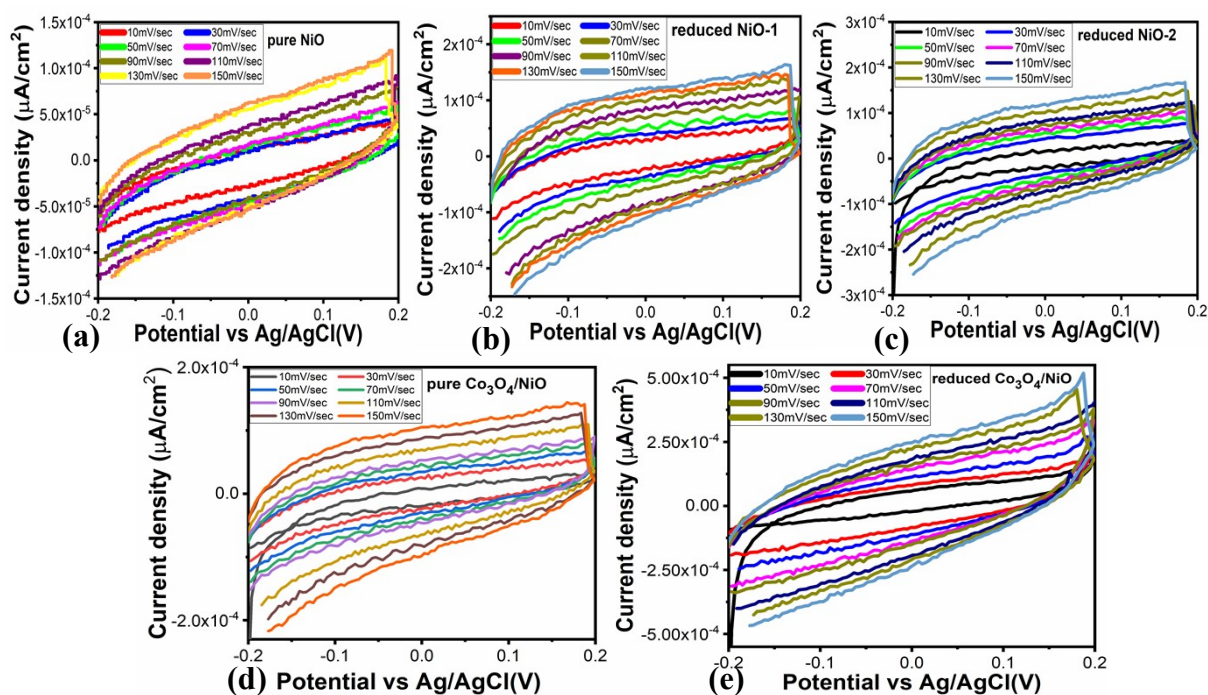

Figure (S4): (a-c) Cyclic voltammetry measured for pure NiO, reduced NiO-1 and reduced NiO-2 in 0.1 M PBS of pH 7.3 at different scan rates, (d) and (e) Cyclic voltammetry measured

for pure  $\text{Co}_3\text{O}_4/\text{NiO}$ , reduced  $\text{Co}_3\text{O}_4/\text{NiO}$ -1 composite in 0.1M PBS of pH 7.3 at different scan rates.
